# Supplementary material
Source: PubMed Central journal article supplement (PMC4086222)
Supplement: Supp_Fig2.pdf [file Supp_Fig2.pdf]

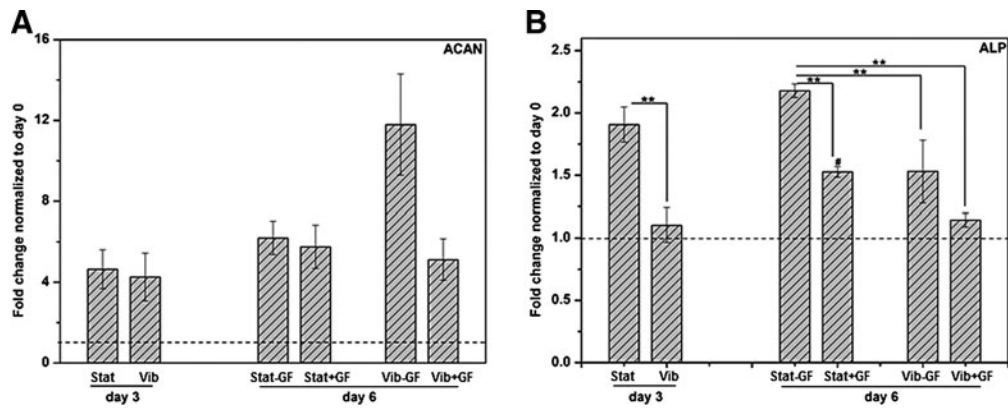

**SUPPLEMENTARY FIG. S2.** Effects of culture conditions on the expression of genes encoding chondrogenic and osteogenic differentiation. *ACAN* (**A**) and *ALP* (**B**) expressions were evaluated by *q*PCR and the relative expression (fold change) was normalized to the level on day 0 (dashed baseline). #Significantly different compared with the corresponding static or dynamic culture at day 3 ( $p < 0.05$ ); \*\*significantly different between the indicated groups ( $p < 0.05$ ).
